# Supplementary material for: Mitochondrial Physiology in the Major Arbovirus Vector Aedes aegypti: Substrate Preferences and Sexual Differences Define Respiratory Capacity and Superoxide Production
Source: PubMed Central journal article supplement (PMC4372595; doi:10.1371/journal.pone.0120600), 2015-03-24
Supplement: pone.0120600.s011.pdf [file pone.0120600.s011.pdf]

| <b>S3 Table: Contribution of different substrates to sustain respiration<br/>in permeabilized flight muscle from <i>A. aegypti</i> males</b> |                |          |                       |          |
|----------------------------------------------------------------------------------------------------------------------------------------------|----------------|----------|-----------------------|----------|
| <b>Metabolic state</b>                                                                                                                       | <b>Pyr+Pro</b> | <b>n</b> | <b>G3P</b>            | <b>n</b> |
| Leak                                                                                                                                         | 12 ± 3         | 13       | 48 ± 12 <sup>a</sup>  | 12       |
| + ADP                                                                                                                                        | 223 ± 40       | 13       | 102 ± 36 <sup>a</sup> | 12       |
| + FCCP                                                                                                                                       | 249 ± 51       | 13       | 122 ± 42 <sup>a</sup> | 12       |
| + Rotenone                                                                                                                                   | 13 ± 4         | 13       | -                     | 12       |
| + Antimycin                                                                                                                                  | 7 ± 3          | 13       | 7 ± 3                 | 12       |

**S3 Table:** Contribution of different substrates to sustain respiration on permeabilized flight muscle of *A. aegypti* males. Values were expressed as mean ± SD of pmol O<sub>2</sub>/s/mL/thorax in five different mitochondrial metabolic states using: 10 mM pyruvate + 10 mM proline, 20 mM *sn* glycerol-3 phosphate, followed by the addition of 2 mM ADP (ADP), 10 μM cytochrome c (not shown), 2.5 μM FCCP, 0.5 μM rotenone, 2.5 μg/mL antimycin A. Statistical analyses were performed using Mann-Whitney test. <sup>a</sup> *p*<0.001 relative to Pyr+Pro.
